# Supplementary material for: A Novel Interaction of Slug (SNAI2) and Nuclear Actin
Source: MDPI journal article supplement (doi:10.3390/cells13080696), 2024-04-17
Supplement: s1 [file s1]

| Genes    | Significant pairs | ANOVA p value | ANOVA q-value | log2 FC G vs.B | log2 FC E vs.B | log2 FC C vs.B | log2 FC G vs.C | log2 FC E vs.C | log2 FC G vs.E |
|----------|-------------------|---------------|---------------|----------------|----------------|----------------|----------------|----------------|----------------|
| ABCE1    | B_G;C_G;E_G       | 0,000         | 0,011         | -0,137         | 0,039          | -0,004         | -0,133         | 0,043          | -0,177         |
| ABHD10   | B_G;C_G;E_G       | 0,000         | 0,014         | -0,323         | 0,031          | -0,003         | -0,321         | 0,034          | -0,354         |
| ABTB2    | B_G;E_G           | 0,003         | 0,041         | -1,767         | -0,111         | -0,801         | -0,966         | 0,690          | -1,656         |
| ADH5     | B_G;C_G;E_G       | 0,000         | 0,009         | -0,419         | 0,048          | 0,016          | -0,435         | 0,032          | -0,467         |
| AHCY     | B_G;C_G;E_G       | 0,001         | 0,016         | -0,131         | -0,007         | -0,006         | -0,125         | -0,001         | -0,124         |
| AHSA1    | B_G;C_G;E_G       | 0,000         | 0,008         | -0,291         | -0,043         | -0,066         | -0,225         | 0,023          | -0,248         |
| AKR1B1   | B_G;C_G;E_G       | 0,002         | 0,035         | -0,336         | -0,045         | -0,013         | -0,323         | -0,032         | -0,291         |
| AP2A1    | B_G;C_G;E_G       | 0,004         | 0,050         | -0,251         | 0,121          | 0,027          | -0,278         | 0,094          | -0,372         |
| AP2B1    | B_G;C_G;E_G       | 0,002         | 0,035         | -0,225         | 0,073          | 0,019          | -0,245         | 0,054          | -0,298         |
| ARF6     | B_G;C_G;E_G       | 0,000         | 0,007         | -0,292         | 0,065          | 0,039          | -0,331         | 0,026          | -0,356         |
| ARFGEF2  | B_G;C_G;E_G       | 0,002         | 0,031         | -0,679         | -0,175         | -0,208         | -0,471         | 0,033          | -0,504         |
| ARIH1    | B_G;C_G           | 0,003         | 0,043         | -0,390         | -0,167         | -0,132         | -0,257         | -0,035         | -0,223         |
| ARL6IP1  | B_G;E_G           | 0,003         | 0,039         | -0,341         | 0,175          | -0,117         | -0,224         | 0,292          | -0,516         |
| ARPC1A   | B_G;C_G;E_G       | 0,000         | 0,013         | -0,382         | -0,038         | -0,130         | -0,251         | 0,092          | -0,344         |
| ARPC2    | B_G;C_G;E_G       | 0,000         | 0,007         | -0,462         | -0,059         | -0,104         | -0,359         | 0,044          | -0,403         |
| ASF1A    | B_G;C_G;E_G       | 0,002         | 0,029         | -0,749         | 0,054          | -0,069         | -0,680         | 0,123          | -0,803         |
| ATL3     | B_G;C_G;E_G       | 0,000         | 0,008         | -0,321         | 0,149          | 0,065          | -0,386         | 0,084          | -0,470         |
| ATP5F1C  | B_G;C_G;E_G       | 0,004         | 0,050         | -0,165         | -0,007         | -0,009         | -0,156         | 0,002          | -0,158         |
| ATP5MK   | B_G;C_G;E_G       | 0,001         | 0,020         | -0,390         | -0,059         | -0,031         | -0,359         | -0,028         | -0,331         |
| ATP6V1C1 | B_G;C_G;E_G       | 0,000         | 0,001         | -0,381         | 0,032          | 0,163          | -0,543         | -0,131         | -0,413         |
| ATXN10   | B_G;C_G;E_G       | 0,000         | 0,000         | -0,338         | 0,080          | -0,006         | -0,332         | 0,086          | -0,417         |
| BANF1    | B_G;C_G;E_G       | 0,002         | 0,031         | -0,618         | 0,108          | -0,067         | -0,551         | 0,175          | -0,726         |
| BRD7     | B_G;C_G;E_G;E_G   | 0,000         | 0,010         | -0,558         | 0,081          | -0,225         | -0,333         | 0,306          | -0,639         |
| BUD23    | B_G;C_G;E_G       | 0,003         | 0,035         | -0,496         | -0,140         | -0,013         | -0,483         | -0,127         | -0,356         |
| BZW2     | B_G;C_G;E_G       | 0,004         | 0,050         | -0,295         | -0,098         | -0,056         | -0,239         | -0,042         | -0,197         |
| CAB39    | B_G;C_G;E_G       | 0,004         | 0,046         | -0,576         | 0,172          | 0,187          | -0,762         | -0,015         | -0,748         |
| CAND1    | B_G;C_G;E_G       | 0,000         | 0,008         | -0,196         | 0,084          | 0,085          | -0,280         | 0,000          | -0,280         |
| CANX     | B_G;C_G;E_G       | 0,000         | 0,009         | -0,181         | -0,010         | 0,011          | -0,192         | -0,021         | -0,171         |
| CCN1     | B_G               | 0,002         | 0,035         | -1,148         | -0,580         | -0,531         | -0,617         | -0,048         | -0,568         |
| CCT8     | B_G;C_G;E_G       | 0,000         | 0,015         | -0,136         | 0,000          | -0,026         | -0,110         | 0,026          | -0,136         |
| CD46     | B_G;C_G;E_G       | 0,001         | 0,020         | -1,183         | 0,135          | -0,154         | -1,029         | 0,289          | -1,318         |
| CD59     | B_G;C_G;E_G       | 0,000         | 0,010         | -0,723         | 0,320          | 0,028          | -0,752         | 0,291          | -1,043         |
| CDC27    | B_G;C_G;E_G       | 0,001         | 0,016         | -0,331         | 0,070          | -0,036         | -0,295         | 0,106          | -0,400         |
| CDK1     | G_B;G_C;G_E       | 0,003         | 0,039         | 0,099          | -0,001         | -0,058         | 0,157          | 0,057          | 0,100          |
| CFL1     | B_G;C_G;E_G       | 0,004         | 0,047         | -0,441         | 0,091          | 0,014          | -0,454         | 0,078          | -0,532         |
| CHORDC1  | B_G;C_G;E_G       | 0,000         | 0,009         | -0,329         | 0,022          | 0,044          | -0,374         | -0,022         | -0,352         |
| CHTOP    | B_G;C_G;E_G       | 0,004         | 0,050         | -0,494         | 0,123          | 0,022          | -0,516         | 0,101          | -0,617         |

|           |                 |       |       |        |        |        |        |        |        |
|-----------|-----------------|-------|-------|--------|--------|--------|--------|--------|--------|
| CKAP2     | B_G;C_G;E_G     | 0,000 | 0,015 | -0,508 | 0,130  | -0,041 | -0,466 | 0,171  | -0,638 |
| CLTA      | B_G;C_G;E_G     | 0,002 | 0,030 | -0,688 | 0,059  | -0,026 | -0,663 | 0,085  | -0,747 |
| CLTC      | B_G;C_G;E_G     | 0,000 | 0,008 | -0,190 | -0,049 | -0,074 | -0,115 | 0,025  | -0,141 |
| COL3A1    | B_E;B_G;C_E;C_G | 0,000 | 0,009 | -0,601 | -0,374 | 0,066  | -0,667 | -0,440 | -0,227 |
| COL4A1    | B_G;C_G;E_G     | 0,001 | 0,026 | -0,804 | -0,064 | -0,235 | -0,568 | 0,172  | -0,740 |
| COPB1     | B_G;C_G;E_G     | 0,000 | 0,007 | -0,306 | 0,038  | 0,038  | -0,344 | 0,000  | -0,344 |
| COPS6     | B_G;C_G;E_G     | 0,000 | 0,000 | -0,386 | -0,034 | 0,001  | -0,387 | -0,035 | -0,352 |
| COX7C     | B_G;C_G;E_G     | 0,000 | 0,006 | -0,919 | 0,150  | 0,157  | -1,076 | -0,007 | -1,069 |
| CPOX      | B_G;C_G;E_G     | 0,000 | 0,006 | -0,910 | 0,139  | 0,015  | -0,926 | 0,124  | -1,050 |
| CPT2      | B_G;C_G;E_G     | 0,001 | 0,015 | -0,462 | 0,019  | -0,008 | -0,453 | 0,028  | -0,481 |
| CSE1L     | B_G;C_G;E_G     | 0,000 | 0,006 | -0,216 | 0,058  | 0,020  | -0,235 | 0,038  | -0,274 |
| CTTNBP2NL | G_B;G_C;G_E     | 0,000 | 0,014 | 0,204  | -0,096 | -0,066 | 0,270  | -0,030 | 0,300  |
| CUL1      | B_C;B_E;B_G     | 0,001 | 0,022 | -0,186 | -0,176 | -0,154 | -0,032 | -0,023 | -0,009 |
| CYCS      | B_G;C_G;E_G     | 0,000 | 0,015 | -0,386 | 0,067  | 0,116  | -0,502 | -0,049 | -0,453 |
| DAZAP1    | B_G;C_G;E_G     | 0,000 | 0,014 | -0,624 | 0,060  | -0,088 | -0,536 | 0,148  | -0,684 |
| DBI       | B_G;C_G;E_G     | 0,001 | 0,015 | -0,605 | -0,090 | -0,037 | -0,568 | -0,053 | -0,515 |
| DBN1      | E_B;E_C;G_B;G_C | 0,000 | 0,014 | 1,416  | 1,309  | -0,065 | 1,482  | 1,374  | 0,107  |
| DCUN1D1   | B_G;C_G;E_G     | 0,000 | 0,012 | -0,295 | -0,004 | -0,070 | -0,225 | 0,066  | -0,291 |
| DDB1      | B_G;C_G;E_G     | 0,000 | 0,000 | -0,313 | 0,017  | 0,002  | -0,315 | 0,015  | -0,330 |
| DDX39A    | B_G;C_G;E_G     | 0,000 | 0,010 | -0,455 | 0,097  | -0,002 | -0,453 | 0,099  | -0,552 |
| DDX39B    | B_G;C_G;E_G     | 0,001 | 0,023 | -0,433 | 0,157  | -0,043 | -0,389 | 0,201  | -0,590 |
| DDX3X     | B_G;C_G;E_G     | 0,001 | 0,015 | -0,404 | -0,023 | -0,059 | -0,345 | 0,036  | -0,381 |
| DDX5      | B_G;C_G;E_G     | 0,002 | 0,030 | -0,192 | 0,063  | 0,007  | -0,199 | 0,056  | -0,255 |
| DERA      | B_G;C_G;E_G     | 0,001 | 0,016 | -0,194 | 0,100  | -0,034 | -0,161 | 0,134  | -0,294 |
| DHCR24    | B_G;C_G;E_G     | 0,000 | 0,015 | -0,573 | -0,018 | 0,055  | -0,628 | -0,073 | -0,555 |
| DHX29     | B_G;C_G;E_G     | 0,000 | 0,013 | -0,251 | -0,093 | -0,083 | -0,168 | -0,010 | -0,158 |
| DHX9      | B_G;E_G         | 0,002 | 0,035 | -0,377 | 0,130  | -0,086 | -0,290 | 0,217  | -0,507 |
| DIAPH1    | B_E;B_G;C_G;E_G | 0,000 | 0,000 | -0,265 | -0,101 | -0,072 | -0,193 | -0,029 | -0,164 |
| DLST      | B_G;C_G;E_G     | 0,000 | 0,002 | -0,530 | -0,054 | -0,013 | -0,518 | -0,041 | -0,477 |
| DNAJA2    | B_G;C_G;E_G     | 0,000 | 0,008 | -0,436 | 0,054  | 0,039  | -0,475 | 0,015  | -0,490 |
| DNAJC8    | C_G;E_G         | 0,001 | 0,027 | -0,129 | 0,093  | 0,092  | -0,221 | 0,001  | -0,222 |
| DNAJC9    | B_G;C_E;C_G     | 0,000 | 0,011 | -0,210 | -0,141 | 0,125  | -0,335 | -0,266 | -0,069 |
| DPM3      | B_G;C_G;E_G     | 0,001 | 0,016 | -0,890 | 0,132  | 0,012  | -0,901 | 0,121  | -1,022 |
| DRAP1     | B_G;C_G;E_G     | 0,002 | 0,031 | -0,734 | 0,172  | 0,018  | -0,752 | 0,154  | -0,905 |
| DYNC1H1   | B_G;C_G;E_G     | 0,000 | 0,000 | -0,145 | -0,028 | -0,028 | -0,117 | 0,000  | -0,118 |
| EBP       | B_G;C_G;E_G     | 0,000 | 0,014 | -1,013 | 0,198  | -0,059 | -0,954 | 0,257  | -1,211 |
| EIF3E     | B_G;C_G;E_G     | 0,002 | 0,035 | -0,273 | 0,123  | 0,093  | -0,366 | 0,030  | -0,396 |
| ELP2      | B_G;C_G;E_G     | 0,001 | 0,019 | -0,241 | 0,076  | 0,043  | -0,284 | 0,034  | -0,318 |

|          |             |       |       |        |        |        |        |        |        |
|----------|-------------|-------|-------|--------|--------|--------|--------|--------|--------|
| EPHX1    | B_G;C_G;E_G | 0,000 | 0,008 | -0,638 | 0,180  | 0,183  | -0,821 | -0,003 | -0,818 |
| ERH      | B_G;C_G;E_G | 0,001 | 0,020 | -0,643 | 0,214  | -0,009 | -0,635 | 0,222  | -0,857 |
| EWSR1    | B_G;C_G;E_G | 0,001 | 0,018 | -0,679 | 0,163  | 0,060  | -0,739 | 0,103  | -0,842 |
| EXOSC1   | B_G;C_G;E_G | 0,002 | 0,031 | -0,438 | 0,048  | -0,069 | -0,370 | 0,116  | -0,486 |
| EXOSC10  | B_G;C_G;E_G | 0,000 | 0,007 | -0,264 | 0,062  | -0,059 | -0,205 | 0,121  | -0,326 |
| EXOSC6   | B_G;C_G;E_G | 0,000 | 0,011 | -0,305 | 0,100  | -0,058 | -0,247 | 0,159  | -0,406 |
| EXOSC7   | B_G;C_G;E_G | 0,002 | 0,035 | -0,574 | 0,122  | 0,011  | -0,584 | 0,112  | -0,696 |
| EXTL2    | B_G;C_G;E_G | 0,000 | 0,007 | -0,526 | -0,065 | -0,086 | -0,440 | 0,021  | -0,461 |
| FERMT2   | B_G;C_G;E_G | 0,000 | 0,007 | -0,317 | -0,022 | 0,000  | -0,317 | -0,023 | -0,295 |
| FGF2     | B_G;E_C;E_G | 0,000 | 0,015 | -0,291 | 0,127  | -0,089 | -0,202 | 0,216  | -0,418 |
| FKBP1A   | B_G;C_G;E_G | 0,001 | 0,017 | -0,845 | 0,043  | 0,056  | -0,902 | -0,013 | -0,889 |
| FKBP4    | B_G;C_G;E_G | 0,002 | 0,034 | -0,283 | -0,059 | 0,007  | -0,290 | -0,067 | -0,223 |
| FN3KRP   | B_E;B_G;C_G | 0,003 | 0,038 | -0,475 | -0,358 | -0,125 | -0,349 | -0,232 | -0,117 |
| FOLR1    | B_G;C_G;E_G | 0,001 | 0,015 | -0,515 | 0,331  | 0,178  | -0,693 | 0,153  | -0,847 |
| FSTL1    | B_G;C_G;E_G | 0,000 | 0,014 | -0,665 | 0,228  | -0,190 | -0,475 | 0,418  | -0,893 |
| GARS1    | B_G;C_G;E_G | 0,001 | 0,015 | -0,140 | -0,019 | -0,038 | -0,102 | 0,019  | -0,120 |
| GLG1     | B_G;C_G;E_G | 0,000 | 0,014 | -0,544 | 0,084  | 0,107  | -0,652 | -0,023 | -0,628 |
| GLRX3    | B_G;C_G;E_G | 0,003 | 0,040 | -0,277 | 0,019  | 0,043  | -0,320 | -0,024 | -0,295 |
| GLYR1    | B_G;C_E;C_G | 0,000 | 0,011 | -0,292 | -0,149 | 0,039  | -0,331 | -0,188 | -0,143 |
| GNG12    | B_G;C_G;E_G | 0,001 | 0,026 | -0,295 | 0,189  | 0,125  | -0,420 | 0,064  | -0,483 |
| GNPDA1   | B_G;C_G;E_G | 0,000 | 0,011 | -0,518 | -0,077 | -0,151 | -0,367 | 0,074  | -0,441 |
| GNPNAT1  | E_B;E_C;E_G | 0,002 | 0,029 | -0,075 | 0,191  | 0,035  | -0,110 | 0,156  | -0,266 |
| GOT1     | B_G;C_G;E_G | 0,000 | 0,000 | -0,550 | 0,105  | 0,001  | -0,551 | 0,104  | -0,656 |
| GPI      | B_G;C_G;E_G | 0,000 | 0,000 | -0,344 | 0,044  | 0,013  | -0,358 | 0,031  | -0,389 |
| GSPT1    | B_G;C_G;E_G | 0,000 | 0,013 | -0,404 | -0,037 | -0,011 | -0,394 | -0,026 | -0,368 |
| GSTO1    | B_G;C_G;E_G | 0,001 | 0,027 | -0,227 | 0,049  | 0,058  | -0,285 | -0,009 | -0,276 |
| GTF2A2   | B_G;C_G;E_G | 0,000 | 0,000 | -3,458 | 0,220  | -0,109 | -3,349 | 0,329  | -3,679 |
| GTF2H1   | B_G;C_G;E_G | 0,003 | 0,041 | -0,549 | 0,253  | 0,030  | -0,579 | 0,223  | -0,802 |
| HEATR5B  | B_C;B_E;B_G | 0,001 | 0,015 | -0,333 | -0,535 | -0,320 | -0,013 | -0,215 | 0,202  |
| HEBP1    | B_G;C_G;E_G | 0,001 | 0,015 | -0,273 | 0,018  | 0,007  | -0,280 | 0,011  | -0,291 |
| HIBCH    | B_G;C_G;E_G | 0,002 | 0,028 | -0,268 | 0,109  | 0,062  | -0,330 | 0,048  | -0,378 |
| HLA-H    | B_G;C_G;E_G | 0,001 | 0,016 | -0,703 | 0,382  | 0,304  | -1,007 | 0,078  | -1,085 |
| HNRNPA0  | B_G;E_G     | 0,003 | 0,044 | -0,267 | 0,099  | -0,056 | -0,211 | 0,155  | -0,366 |
| HNRNPA1  | B_G;C_G;E_G | 0,000 | 0,006 | -1,594 | 0,282  | -0,102 | -1,492 | 0,384  | -1,876 |
| HNRNPA3  | B_G;C_G;E_G | 0,001 | 0,021 | -0,712 | 0,132  | -0,152 | -0,560 | 0,285  | -0,845 |
| HNRNPD   | B_G;C_G;E_G | 0,000 | 0,011 | -0,249 | 0,058  | -0,038 | -0,211 | 0,096  | -0,307 |
| HNRNPU   | B_G;C_G;E_G | 0,002 | 0,028 | -0,281 | 0,023  | -0,085 | -0,196 | 0,108  | -0,303 |
| HSD17B11 | B_G;C_G;E_G | 0,000 | 0,015 | -0,569 | -0,032 | -0,042 | -0,527 | 0,010  | -0,537 |

|          |                 |       |       |        |        |        |        |        |        |
|----------|-----------------|-------|-------|--------|--------|--------|--------|--------|--------|
| HSD17B12 | B_G;C_G;E_G     | 0,004 | 0,047 | -0,323 | -0,062 | -0,019 | -0,304 | -0,043 | -0,261 |
| HSP90B1  | B_G;C_G;E_G     | 0,004 | 0,049 | -0,099 | 0,023  | 0,040  | -0,139 | -0,017 | -0,122 |
| HSPBP1   | B_G;C_G;E_G     | 0,002 | 0,031 | -0,204 | 0,061  | 0,004  | -0,208 | 0,056  | -0,265 |
| HTRA1    | B_G;C_E;C_G     | 0,001 | 0,015 | -0,685 | -0,347 | 0,081  | -0,766 | -0,428 | -0,338 |
| IARS1    | B_G;C_G;E_G     | 0,000 | 0,007 | -0,191 | 0,062  | 0,021  | -0,212 | 0,041  | -0,252 |
| ID1      | E_B;E_C;G_B;G_C | 0,000 | 0,006 | 0,603  | 0,506  | 0,012  | 0,592  | 0,494  | 0,097  |
| IDI1     | B_G;C_G;E_G     | 0,000 | 0,011 | -0,562 | 0,041  | 0,018  | -0,579 | 0,024  | -0,603 |
| IPO5     | B_G;C_G;E_G     | 0,002 | 0,029 | -0,347 | 0,069  | 0,005  | -0,352 | 0,063  | -0,416 |
| KPNA1    | B_G;C_G;E_G     | 0,001 | 0,022 | -0,457 | -0,108 | -0,160 | -0,297 | 0,052  | -0,349 |
| KPNB1    | B_G;C_G;E_G     | 0,000 | 0,012 | -0,288 | 0,062  | 0,049  | -0,338 | 0,012  | -0,350 |
| LARS1    | B_G;C_G;E_G     | 0,000 | 0,005 | -0,144 | 0,017  | 0,002  | -0,146 | 0,015  | -0,162 |
| LAS1L    | B_G;C_G;E_G     | 0,003 | 0,040 | -0,211 | 0,071  | -0,016 | -0,195 | 0,088  | -0,283 |
| LDHA     | B_G;C_G;E_G     | 0,000 | 0,011 | -0,263 | 0,072  | 0,015  | -0,279 | 0,057  | -0,335 |
| LIPA     | B_G;E_G         | 0,003 | 0,040 | -1,888 | 0,396  | -0,951 | -0,937 | 1,347  | -2,284 |
| LMBRD2   | B_G;C_G;E_G     | 0,000 | 0,007 | -1,146 | 0,004  | -0,148 | -0,998 | 0,152  | -1,150 |
| LSM8     | B_G;C_G;E_G     | 0,002 | 0,033 | -0,494 | 0,181  | 0,040  | -0,534 | 0,141  | -0,675 |
| LUZP1    | B_G;C_G;E_G     | 0,003 | 0,039 | -0,276 | 0,093  | 0,010  | -0,285 | 0,083  | -0,368 |
| M6PR     | B_G;C_G;E_G     | 0,001 | 0,020 | -0,494 | -0,087 | -0,033 | -0,461 | -0,054 | -0,407 |
| MAP4     | B_G;C_G;E_G     | 0,000 | 0,011 | -0,219 | 0,011  | -0,014 | -0,206 | 0,025  | -0,230 |
| MARCKS   | B_G;C_G;E_G     | 0,001 | 0,026 | -0,504 | 0,089  | 0,024  | -0,528 | 0,065  | -0,593 |
| MDH1     | B_G;C_G;E_G     | 0,003 | 0,038 | -0,415 | 0,131  | 0,033  | -0,448 | 0,098  | -0,546 |
| MED20    | B_G;E_G         | 0,004 | 0,046 | -0,381 | -0,092 | -0,160 | -0,222 | 0,067  | -0,289 |
| MET      | B_G;C_G         | 0,001 | 0,027 | -0,264 | -0,139 | -0,091 | -0,172 | -0,048 | -0,124 |
| METAP2   | B_G;C_G         | 0,001 | 0,015 | -0,401 | -0,201 | -0,084 | -0,317 | -0,116 | -0,200 |
| MIX23    | B_G;C_G;E_G     | 0,000 | 0,014 | -0,308 | 0,097  | 0,056  | -0,365 | 0,041  | -0,405 |
| MON2     | B_G;C_G;E_G     | 0,002 | 0,030 | -0,281 | 0,162  | 0,039  | -0,321 | 0,123  | -0,444 |
| MRPL9    | B_G;C_G;E_G     | 0,000 | 0,011 | -0,319 | 0,037  | 0,045  | -0,364 | -0,008 | -0,356 |
| MSMO1    | B_G;C_G;E_G     | 0,001 | 0,023 | -1,714 | 0,209  | 0,126  | -1,840 | 0,083  | -1,923 |
| MT-ATP6  | B_G;C_G;E_G     | 0,000 | 0,011 | -0,505 | 0,031  | -0,063 | -0,442 | 0,093  | -0,535 |
| MYBBP1A  | B_G;C_G;E_G     | 0,000 | 0,014 | -0,419 | 0,023  | -0,051 | -0,368 | 0,074  | -0,442 |
| MYO5A    | E_B;E_C;G_B;G_C | 0,002 | 0,034 | 2,373  | 2,282  | 0,516  | 1,857  | 1,766  | 0,091  |
| NDUFB11  | B_G;C_G;E_G     | 0,000 | 0,012 | -3,369 | 0,308  | 0,036  | -3,405 | 0,272  | -3,677 |
| NME1     | B_G;C_G;E_G     | 0,001 | 0,020 | -0,549 | 0,013  | 0,065  | -0,613 | -0,052 | -0,561 |
| NOMO1    | B_G;C_G;E_G     | 0,000 | 0,008 | -2,110 | -0,093 | -0,274 | -1,836 | 0,180  | -2,016 |
| NOP53    | B_G;E_G         | 0,001 | 0,025 | -0,281 | 0,129  | -0,089 | -0,193 | 0,217  | -0,410 |
| NPC2     | B_G;C_G;E_G     | 0,001 | 0,015 | -0,464 | 0,064  | 0,109  | -0,574 | -0,045 | -0,528 |
| NRDC     | B_G;C_G;E_G     | 0,000 | 0,014 | -0,201 | 0,024  | -0,016 | -0,186 | 0,039  | -0,225 |
| NUP93    | B_G;C_G;E_G     | 0,000 | 0,000 | -0,159 | -0,040 | -0,017 | -0,142 | -0,023 | -0,119 |

|         |                   |       |       |        |        |        |        |        |        |
|---------|-------------------|-------|-------|--------|--------|--------|--------|--------|--------|
| NXF1    | B_G;C_G;E_G       | 0,000 | 0,007 | -0,184 | -0,027 | 0,034  | -0,217 | -0,061 | -0,157 |
| ODR4    | B_G;E_G           | 0,004 | 0,048 | -0,227 | 0,094  | -0,111 | -0,116 | 0,205  | -0,321 |
| PA2G4   | B_G;C_G;E_G       | 0,000 | 0,007 | -0,253 | 0,017  | -0,015 | -0,238 | 0,032  | -0,270 |
| PARVA   | B_G;C_G;E_G       | 0,002 | 0,028 | -0,545 | 0,135  | -0,015 | -0,530 | 0,150  | -0,680 |
| PBK     | G_B;G_C;G_E       | 0,003 | 0,044 | 0,232  | -0,071 | 0,036  | 0,196  | -0,108 | 0,304  |
| PCMT1   | B_G;C_G;E_G       | 0,002 | 0,029 | -0,423 | 0,090  | 0,022  | -0,445 | 0,068  | -0,513 |
| PCYOX1  | B_G;C_G;E_G       | 0,001 | 0,026 | -0,302 | 0,001  | 0,065  | -0,367 | -0,064 | -0,303 |
| PICALM  | B_G;C_G;E_G       | 0,001 | 0,015 | -0,419 | 0,017  | -0,049 | -0,370 | 0,065  | -0,435 |
| PIGT    | B_G;C_G;E_G       | 0,001 | 0,016 | -0,265 | 0,055  | 0,038  | -0,303 | 0,017  | -0,320 |
| PLK1    | B_G;C_G;E_G       | 0,001 | 0,024 | -0,497 | 0,008  | -0,084 | -0,413 | 0,092  | -0,505 |
| PLS3    | B_G;C_G           | 0,003 | 0,041 | -0,156 | -0,046 | 0,014  | -0,169 | -0,060 | -0,109 |
| PLSCR3  | C_B;C_E;G_B;G_E   | 0,001 | 0,019 | 2,340  | -0,445 | 1,732  | 0,608  | -2,177 | 2,785  |
| POLR1B  | B_C;B_G           | 0,004 | 0,050 | -0,288 | -0,123 | -0,235 | -0,053 | 0,113  | -0,166 |
| PPP1CA  | B_G;C_G;E_G       | 0,000 | 0,007 | -0,477 | 0,052  | -0,020 | -0,457 | 0,072  | -0,529 |
| PRC1    | B_G;C_G;E_G       | 0,001 | 0,027 | -0,542 | -0,130 | -0,129 | -0,413 | -0,001 | -0,412 |
| PRDX1   | B_G;C_G;E_G       | 0,001 | 0,023 | -0,354 | 0,087  | 0,005  | -0,359 | 0,082  | -0,441 |
| PRKDC   | B_G;C_G;E_G       | 0,001 | 0,015 | -0,157 | 0,047  | 0,030  | -0,187 | 0,017  | -0,205 |
| PRPS1   | B_G;C_G;E_G       | 0,000 | 0,004 | -0,482 | 0,111  | -0,045 | -0,437 | 0,156  | -0,593 |
| PRPS2   | G_C;G_E           | 0,001 | 0,022 | 0,373  | -0,286 | -0,197 | 0,569  | -0,090 | 0,659  |
| PSMD1   | B_G;C_G;E_G       | 0,002 | 0,035 | -0,134 | -0,021 | -0,026 | -0,108 | 0,005  | -0,113 |
| PSMD2   | B_G;C_G;E_G       | 0,000 | 0,007 | -0,287 | 0,015  | -0,016 | -0,271 | 0,031  | -0,302 |
| PSMD5   | B_G;C_G;E_G       | 0,000 | 0,000 | -0,299 | 0,042  | -0,020 | -0,280 | 0,062  | -0,342 |
| PSME1   | B_G;C_G;E_G       | 0,001 | 0,015 | -0,457 | 0,135  | 0,082  | -0,539 | 0,053  | -0,592 |
| PTPA    | B_G;C_G;E_G       | 0,001 | 0,018 | -0,417 | 0,087  | 0,059  | -0,476 | 0,028  | -0,504 |
| PYGL    | B_E;B_G;C_E;C_G;E | 0,000 | 0,000 | -0,205 | -0,087 | 0,018  | -0,223 | -0,105 | -0,119 |
| RAB21   | B_G;C_G;E_G       | 0,001 | 0,017 | -0,337 | 0,008  | 0,000  | -0,337 | 0,008  | -0,345 |
| RACK1   | B_G;C_G;E_G       | 0,002 | 0,035 | -0,414 | 0,010  | -0,071 | -0,343 | 0,081  | -0,424 |
| RAN     | B_G;C_G;E_G       | 0,001 | 0,015 | -0,269 | 0,094  | 0,007  | -0,276 | 0,086  | -0,363 |
| RECQL   | B_G;C_G;E_G       | 0,002 | 0,033 | -0,524 | 0,020  | -0,066 | -0,458 | 0,086  | -0,544 |
| RFC5    | B_G;C_G;E_G       | 0,000 | 0,015 | -0,340 | 0,039  | 0,074  | -0,414 | -0,035 | -0,379 |
| RFXAP   | C_B;C_G;E_B;E_G   | 0,002 | 0,033 | -0,087 | 1,054  | 1,162  | -1,249 | -0,108 | -1,141 |
| RPA1    | B_G;C_G;E_G       | 0,004 | 0,050 | -0,579 | 0,025  | -0,013 | -0,566 | 0,038  | -0,604 |
| RPL26L1 | B_G;C_G;E_G       | 0,000 | 0,010 | -1,927 | 0,123  | 0,149  | -2,076 | -0,026 | -2,050 |
| RPL28   | B_G;C_G;E_G       | 0,001 | 0,015 | -0,738 | 0,197  | 0,103  | -0,841 | 0,094  | -0,936 |
| RPL35A  | B_G;C_G;E_G       | 0,003 | 0,040 | -0,583 | 0,094  | 0,023  | -0,607 | 0,070  | -0,677 |
| RPLP2   | B_G;C_G;E_G       | 0,002 | 0,031 | -0,287 | 0,074  | 0,003  | -0,290 | 0,070  | -0,361 |
| RPN2    | B_G;C_G;E_G       | 0,002 | 0,030 | -0,206 | -0,004 | 0,027  | -0,232 | -0,031 | -0,201 |
| RPS16   | B_G;C_G;E_G       | 0,000 | 0,010 | -0,239 | 0,045  | 0,036  | -0,275 | 0,009  | -0,284 |

|          |                 |       |       |        |        |        |        |        |        |
|----------|-----------------|-------|-------|--------|--------|--------|--------|--------|--------|
| RPS2     | B_G;C_G;E_G     | 0,001 | 0,017 | -0,182 | -0,037 | -0,052 | -0,130 | 0,015  | -0,145 |
| RPS8     | B_G;C_G;E_G     | 0,003 | 0,037 | -0,269 | -0,005 | -0,023 | -0,246 | 0,018  | -0,264 |
| RRAGA    | B_G             | 0,002 | 0,028 | -0,584 | -0,272 | -0,264 | -0,320 | -0,008 | -0,312 |
| RTN4     | B_G;C_G;E_G     | 0,001 | 0,022 | -0,504 | -0,069 | -0,016 | -0,487 | -0,053 | -0,435 |
| RTRAF    | B_G;C_G;E_G     | 0,001 | 0,015 | -0,369 | 0,109  | 0,029  | -0,398 | 0,079  | -0,477 |
| S100A10  | B_G;C_G;E_G     | 0,001 | 0,015 | -0,694 | -0,022 | -0,012 | -0,682 | -0,011 | -0,671 |
| SAR1A    | B_G;C_G;E_G     | 0,003 | 0,040 | -0,269 | 0,092  | -0,037 | -0,231 | 0,129  | -0,360 |
| SAR1B    | B_G;C_G;E_G     | 0,002 | 0,030 | -0,212 | 0,028  | 0,052  | -0,264 | -0,024 | -0,241 |
| SEC23A   | B_G;C_G;E_G     | 0,000 | 0,009 | -0,207 | -0,008 | -0,038 | -0,169 | 0,030  | -0,200 |
| SEC24C   | B_G;C_G;E_G     | 0,001 | 0,020 | -0,215 | 0,063  | 0,001  | -0,215 | 0,062  | -0,278 |
| SEC61A1  | B_G;C_G;E_G     | 0,002 | 0,035 | -0,621 | -0,036 | 0,017  | -0,638 | -0,053 | -0,586 |
| SEC61B   | B_G;C_G;E_G     | 0,000 | 0,014 | -1,828 | 0,131  | -0,123 | -1,706 | 0,253  | -1,959 |
| SENP3    | B_E;C_E         | 0,001 | 0,016 | -0,070 | -0,172 | 0,014  | -0,083 | -0,186 | 0,102  |
| SERPINE1 | B_G;C_G;E_G     | 0,000 | 0,010 | -0,895 | -0,234 | 0,125  | -1,020 | -0,359 | -0,661 |
| SET      | G_B;G_C;G_E     | 0,003 | 0,042 | 0,408  | -0,003 | 0,009  | 0,399  | -0,012 | 0,411  |
| SIN3A    | B_G;C_G;E_G     | 0,002 | 0,031 | -0,187 | -0,027 | -0,008 | -0,179 | -0,019 | -0,160 |
| SKIC3    | B_G;C_G;E_G     | 0,001 | 0,017 | -0,160 | 0,017  | 0,037  | -0,197 | -0,020 | -0,177 |
| SLC25A11 | B_G;C_G;E_G     | 0,001 | 0,015 | -0,336 | 0,099  | 0,009  | -0,345 | 0,090  | -0,435 |
| SLC25A5  | B_G;C_G;E_G     | 0,001 | 0,015 | -0,186 | 0,137  | 0,015  | -0,200 | 0,122  | -0,323 |
| SLC35A4  | B_G;C_G;E_G     | 0,000 | 0,014 | -0,455 | -0,007 | 0,052  | -0,507 | -0,059 | -0,448 |
| SLC38A2  | G_B;G_C         | 0,004 | 0,050 | 0,466  | 0,292  | 0,123  | 0,343  | 0,169  | 0,173  |
| SLC3A2   | B_G;C_G;E_G     | 0,003 | 0,037 | -0,208 | -0,055 | -0,057 | -0,151 | 0,001  | -0,153 |
| SMU1     | B_G;C_G;E_G     | 0,002 | 0,035 | -0,396 | 0,108  | -0,006 | -0,390 | 0,114  | -0,504 |
| SPAG7    | B_G;C_G;E_G     | 0,001 | 0,026 | -0,293 | 0,120  | 0,061  | -0,354 | 0,059  | -0,414 |
| SPCS3    | B_G;C_G;E_G     | 0,001 | 0,020 | -0,434 | 0,012  | 0,051  | -0,485 | -0,039 | -0,446 |
| SRP68    | B_G;C_G;E_G     | 0,004 | 0,050 | -0,182 | -0,020 | 0,035  | -0,217 | -0,055 | -0,162 |
| STAG2    | B_G;C_G;E_B;E_G | 0,000 | 0,007 | -0,162 | 0,123  | 0,060  | -0,222 | 0,063  | -0,285 |
| STAU1    | B_G;C_G;E_G     | 0,002 | 0,028 | -0,384 | -0,072 | -0,037 | -0,346 | -0,035 | -0,311 |
| SYF2     | B_G;C_G;E_G     | 0,000 | 0,011 | -0,615 | 0,059  | -0,026 | -0,589 | 0,085  | -0,675 |
| TAB2     | B_G;C_G;E_G     | 0,001 | 0,015 | -1,071 | 0,086  | -0,295 | -0,776 | 0,381  | -1,157 |
| TARS1    | B_G;C_G;E_G     | 0,001 | 0,016 | -0,288 | 0,114  | 0,058  | -0,347 | 0,055  | -0,402 |
| TBCB     | G_B;G_C;G_E     | 0,004 | 0,045 | 0,364  | -0,143 | -0,022 | 0,385  | -0,121 | 0,507  |
| TFPI2    | B_G;C_G;E_G     | 0,000 | 0,015 | -1,934 | -0,430 | -0,089 | -1,845 | -0,342 | -1,504 |
| TIMM13   | B_G;C_G;E_G     | 0,002 | 0,035 | -0,145 | 0,084  | 0,050  | -0,194 | 0,034  | -0,228 |
| TMA7     | B_G;C_G;E_G     | 0,001 | 0,015 | -2,827 | 0,172  | 0,309  | -3,136 | -0,137 | -2,999 |
| TMED2    | B_G;C_G;E_G     | 0,002 | 0,029 | -0,684 | -0,082 | 0,051  | -0,735 | -0,133 | -0,602 |
| TMED3    | B_G;C_G;E_G     | 0,001 | 0,015 | -0,622 | 0,091  | -0,107 | -0,515 | 0,197  | -0,713 |
| TMEM43   | B_G;C_G;E_G     | 0,002 | 0,035 | -0,645 | 0,136  | 0,095  | -0,741 | 0,041  | -0,781 |



|         |             |       |       |        |        |        |        |        |        |
|---------|-------------|-------|-------|--------|--------|--------|--------|--------|--------|
| TMEM87A | E_B;E_G     | 0,001 | 0,026 | -0,206 | 0,497  | 0,174  | -0,380 | 0,323  | -0,703 |
| TMEM97  | B_G;C_G;E_G | 0,004 | 0,050 | -0,692 | 0,079  | 0,108  | -0,800 | -0,029 | -0,771 |
| TNPO3   | B_G;C_G;E_G | 0,000 | 0,008 | -0,474 | 0,116  | 0,148  | -0,622 | -0,032 | -0,590 |
| TPI1    | B_G;C_G;E_G | 0,000 | 0,010 | -0,183 | 0,078  | 0,033  | -0,216 | 0,045  | -0,261 |
| TRIM25  | B_G;C_G;E_G | 0,001 | 0,016 | -0,326 | 0,038  | -0,045 | -0,281 | 0,082  | -0,364 |
| TSTD1   | B_G;C_G;E_G | 0,002 | 0,035 | -0,933 | 0,146  | 0,293  | -1,226 | -0,146 | -1,080 |
| TXN     | B_G;C_G;E_G | 0,001 | 0,025 | -0,805 | 0,116  | -0,042 | -0,763 | 0,158  | -0,921 |
| TXNDC5  | B_G;C_G;E_G | 0,000 | 0,014 | -0,451 | 0,075  | 0,008  | -0,459 | 0,067  | -0,526 |
| UCHL5   | C_G;E_G     | 0,002 | 0,034 | -0,106 | 0,113  | 0,049  | -0,155 | 0,065  | -0,220 |
| VCL     | B_G;C_G;E_G | 0,002 | 0,035 | -0,609 | 0,133  | 0,044  | -0,653 | 0,089  | -0,742 |
| VDAC3   | B_G;C_G;E_G | 0,003 | 0,040 | -0,254 | 0,003  | 0,009  | -0,264 | -0,007 | -0,257 |
| WDFY1   | B_G;C_G;E_G | 0,001 | 0,015 | -0,186 | 0,070  | 0,033  | -0,219 | 0,038  | -0,256 |
| WDR5    | B_G;C_G;E_G | 0,003 | 0,044 | -0,345 | 0,026  | 0,147  | -0,492 | -0,121 | -0,371 |
| WDR6    | B_G;C_G;E_G | 0,000 | 0,011 | -0,425 | 0,078  | -0,052 | -0,373 | 0,129  | -0,502 |
| XPO1    | B_G;C_G;E_G | 0,000 | 0,009 | -0,219 | 0,059  | -0,002 | -0,217 | 0,060  | -0,278 |
| YARS1   | B_G;C_G;E_G | 0,003 | 0,041 | -0,115 | -0,017 | -0,008 | -0,106 | -0,009 | -0,097 |
| YWHAE   | B_G;C_G;E_G | 0,003 | 0,043 | -0,212 | 0,051  | 0,014  | -0,226 | 0,036  | -0,263 |
| ZC3H18  | B_G;C_G;E_G | 0,002 | 0,034 | -0,327 | -0,007 | -0,041 | -0,285 | 0,035  | -0,320 |

**Supplementary Table S1: Multiple comparisons of different experimental conditions with respect to proteins interacting with actin.** Only proteins showing significant changes between at least two groups are listed. B: Untreated control, C: Treatment with latB, D: UV irradiation, no repair, E: UV irradiation, no repair + LatB treatment, G: UV irradiation, 1h repair and LatB treatment. Comparisons with the other groups (e.g. F: UV treatment plus 1h repair) elicited no significant changes.
